# Supplementary material for: Double Competitive Immunodetection of Small Analyte: Realization for Highly Sensitive Lateral Flow Immunoassay of Chloramphenicol
Source: MDPI journal article supplement (doi:10.3390/bios12050343), 2022-05-17
Supplement: s1 [file s1]

## Supplementary Information

### Double Competitive Immunodetection of Small Analyte: Realization for Highly Sensitive Lateral Flow Immunoassay of Chlo-Ramphenicol

Dmitriy V. Sotnikov<sup>1</sup>, Lyubov V. Barshevskaya<sup>1</sup>, Anastasia V. Bartosh<sup>1</sup>, Anatoly V. Zherdev<sup>1</sup> and Boris B. Dzantiev<sup>1\*</sup>

<sup>1</sup> A.N. Bach Institute of Biochemistry, Research Center of Biotechnology of the Russian Academy of Sciences, Leninsky prospect 33, Moscow 119071, Russia

\* Correspondence: dzantiev@inbi.ras.ru, Tel.: +7-495-954-31-42

$$\begin{aligned}
 \frac{d([P] \cdot V_{\text{compartment}})}{dt} &= V_{\text{compartment}} \cdot ("(\text{reaction1}).k2" \cdot [AP] - "(\text{reaction1}).k1" \cdot [A] \cdot [P]) \\
 \frac{d([A] \cdot V_{\text{compartment}})}{dt} &= V_{\text{compartment}} \cdot ("(\text{reaction1}).k2" \cdot [AP] - "(\text{reaction1}).k1" \cdot [P] \cdot [A]) \\
 \frac{d([AP] \cdot V_{\text{compartment}})}{dt} &= V_{\text{compartment}} \cdot ("(\text{reaction1}).k1" \cdot [A] \cdot [P] - "(\text{reaction1}).k2" \cdot [AP]) \\
 \frac{d([R] \cdot V_{\text{compartment}})}{dt} &= V_{\text{compartment}} \cdot ("(\text{reaction2}).k2" \cdot [PR] - "(\text{reaction2}).k1" \cdot [R] \cdot [P]) \cdot h \\
 \frac{d([PR] \cdot V_{\text{compartment}})}{dt} &= V_{\text{compartment}} \cdot ("(\text{reaction2}).k1" \cdot [R] \cdot [P] - "(\text{reaction2}).k2" \cdot [PR]) \cdot h \\
 h &= \begin{cases} \text{Time} < T, & 0 \\ \text{else,} & 1 \end{cases}
 \end{aligned}$$

**A**

$$\begin{aligned}
 \frac{d([A] \cdot V_{\text{compartment}})}{dt} &= V_{\text{compartment}} \cdot ("(\text{reaction\_1}).k2" \cdot [AP] - "(\text{reaction\_1}).k1" \cdot [A] \cdot [P]) \\
 \frac{d([AP] \cdot V_{\text{compartment}})}{dt} &= V_{\text{compartment}} \cdot ("(\text{reaction\_1}).k1" \cdot [A] \cdot [P] - "(\text{reaction\_1}).k2" \cdot [AP]) \\
 \frac{d([P] \cdot V_{\text{compartment}})}{dt} &= V_{\text{compartment}} \cdot ("(\text{reaction\_1}).k2" \cdot [AP] - "(\text{reaction\_1}).k1" \cdot [A] \cdot [P] + "(\text{reaction\_2}).k2" \cdot [PC] - "(\text{reaction\_2}).k1" \cdot [P] \cdot [C] + "(\text{reaction\_3}).k2" \cdot [PCP] - "(\text{reaction\_3}).k1" \cdot [P] \cdot [PC]) \\
 \frac{d([C] \cdot V_{\text{compartment}})}{dt} &= V_{\text{compartment}} \cdot ("(\text{reaction\_2}).k2" \cdot [PC] - "(\text{reaction\_2}).k1" \cdot [P] \cdot [C]) \\
 \frac{d([PC] \cdot V_{\text{compartment}})}{dt} &= V_{\text{compartment}} \cdot ("(\text{reaction\_2}).k1" \cdot [P] \cdot [C] - "(\text{reaction\_2}).k2" \cdot [PC] - "(\text{reaction\_3}).k1" \cdot [P] \cdot [PC] + "(\text{reaction\_3}).k2" \cdot [PCP]) \\
 \frac{d([PCP] \cdot V_{\text{compartment}})}{dt} &= V_{\text{compartment}} \cdot ("(\text{reaction\_3}).k1" \cdot [P] \cdot [PC] - "(\text{reaction\_3}).k2" \cdot [PCP]) \\
 \frac{d([AR] \cdot V_{\text{compartment}})}{dt} &= V_{\text{compartment}} \cdot ("(\text{reaction\_4}).k1" \cdot [A] \cdot [R] - "(\text{reaction\_4}).k2" \cdot [AR]) \cdot h \\
 \frac{d([R] \cdot V_{\text{compartment}})}{dt} &= V_{\text{compartment}} \cdot ("(\text{reaction\_4}).k2" \cdot [AR] - "(\text{reaction\_4}).k1" \cdot [A] \cdot [R] + "(\text{reaction\_5}).k2" \cdot [CR] - "(\text{reaction\_5}).k1" \cdot [C] \cdot [R] + "(\text{reaction\_6}).k2" \cdot [PCR] - "(\text{reaction\_6}).k1" \cdot [PC] \cdot [R]) \cdot h \\
 \frac{d([CR] \cdot V_{\text{compartment}})}{dt} &= V_{\text{compartment}} \cdot ("(\text{reaction\_5}).k1" \cdot [C] \cdot [R] - "(\text{reaction\_5}).k2" \cdot [CR] + "(\text{reaction\_7}).k2" \cdot [PCR] - "(\text{reaction\_7}).k1" \cdot [P] \cdot [CR]) \cdot h \\
 \frac{d([PCR] \cdot V_{\text{compartment}})}{dt} &= V_{\text{compartment}} \cdot ("(\text{reaction\_6}).k1" \cdot [PC] \cdot [R] - "(\text{reaction\_6}).k2" \cdot [PCR] + "(\text{reaction\_7}).k1" \cdot [P] \cdot [CR] - "(\text{reaction\_7}).k2" \cdot [PCR]) \cdot h \\
 h &= \begin{cases} \text{Time} < T, & 0 \\ \text{else,} & 1 \end{cases}
 \end{aligned}$$

**B**

Figure S1. Differential equations systems for describing the kinetics of affine interactions for standard competitive LFIA (A) and proposed alternative scheme of competitive immunochromatography (B).

## Species

| #  | Name | Compartment | Type | Unit    | Initial Concentration [Unit] | Concentration [Unit] | Rate [Unit/s] | Reactions | Initial Expression [Unit] |
|----|------|-------------|------|---------|------------------------------|----------------------|---------------|-----------|---------------------------|
| 1  | B    | compartment | ode  | mmol/ml | 1e-08                        | nan                  | nan           | 3         |                           |
| 2  | BA   | compartment | ode  | mmol/ml | 0                            | nan                  | nan           | 4         |                           |
| 3  | A    | compartment | ode  | mmol/ml | 1e-07                        | nan                  | nan           | 4         |                           |
| 4  | ABA  | compartment | ode  | mmol/ml | 0                            | nan                  | nan           | 1         |                           |
| 5  | BP   | compartment | ode  | mmol/ml | 0                            | nan                  | nan           | 4         |                           |
| 6  | P    | compartment | ode  | mmol/ml | 1e-08                        | nan                  | nan           | 4         |                           |
| 7  | PBP  | compartment | ode  | mmol/ml | 0                            | nan                  | nan           | 1         |                           |
| 8  | ABP  | compartment | ode  | mmol/ml | 0                            | nan                  | nan           | 2         |                           |
| 9  | BR   | compartment | ode  | mmol/ml | 0                            | nan                  | nan           | 3         |                           |
| 10 | R    | compartment | ode  | mmol/ml | 1e-08                        | nan                  | nan           | 3         |                           |
| 11 | ABR  | compartment | ode  | mmol/ml | 0                            | nan                  | nan           | 2         |                           |
| 12 | PBR  | compartment | ode  | mmol/ml | 0                            | nan                  | nan           | 2         |                           |

## Reactions

| #  | Name         | Reaction     | Rate Law                 | Flux [mmol/s] | Noise Expression |
|----|--------------|--------------|--------------------------|---------------|------------------|
| 1  | reaction1    | B + A = BA   | Mass action (reversible) | nan           |                  |
| 2  | reaction2    | BA + A = ABA | Mass action (reversible) | nan           |                  |
| 3  | reaction3    | B + P = BP   | Mass action (reversible) | nan           |                  |
| 4  | reaction4    | BP + P = PBP | Mass action (reversible) | nan           |                  |
| 5  | reaction5    | BA + P = ABP | Mass action (reversible) | nan           |                  |
| 6  | reaction6    | BP + A = ABP | Mass action (reversible) | nan           |                  |
| 7  | reaction7    | B + R = BR   | Mass action (reversible) | nan           |                  |
| 8  | reaction8    | BR + A = ABR | Mass action (reversible) | nan           |                  |
| 9  | reaction9    | BR + P = PBR | Mass action (reversible) | nan           |                  |
| 10 | reaction10   | BA + R = ABR | Mass action (reversible) | nan           |                  |
| 11 | reaction11   | BP + R = PBR | Mass action (reversible) | nan           |                  |
|    | New Reaction |              |                          |               |                  |

| Expression<br>[Unit] or [Unit/s]                                                                                                                                                                                     |
|----------------------------------------------------------------------------------------------------------------------------------------------------------------------------------------------------------------------|
| $(\text{reaction1}).k2*[BA] - (\text{reaction1}).k1*[A]*[B] + ((\text{reaction3}).k2*[BP] - (\text{reaction3}).k1*[B]*[P]) * \text{Values}[h1]$                                                                      |
| $(\text{reaction1}).k1*[B]*[A] + (\text{reaction2}).k2*[ABA] - (\text{reaction1}).k2*[BA] - (\text{reaction2}).k1*[BA]*[A] + ((\text{reaction5}).k2*[ABP] - (\text{reaction5}).k1*[BA]*[P]) * \text{Values}[h1]$     |
| $(\text{reaction1}).k2*[BA] + (\text{reaction2}).k2*[ABA] - (\text{reaction1}).k1*[B]*[A] - (\text{reaction2}).k1*[A]*[BA] + ((\text{reaction6}).k2*[ABP] - (\text{reaction6}).k1*[A]*[BP]) * \text{Values}[h1]$     |
| $(\text{reaction2}).k1*[A]*[BA] - (\text{reaction2}).k2*[ABA]$                                                                                                                                                       |
| $((\text{reaction3}).k1*[B]*[P] + (\text{reaction4}).k2*[PBP] + (\text{reaction5}).k2*[ABP] - (\text{reaction3}).k2*[BP] - (\text{reaction4}).k1*[BP]*[P] - (\text{reaction6}).k1*[A]*[BP]) * \text{Values}[h1]$     |
| $((\text{reaction3}).k2*[BP] + (\text{reaction4}).k2*[PBP] + (\text{reaction5}).k2*[ABP] - (\text{reaction3}).k1*[B]*[P] - (\text{reaction4}).k1*[BP]*[P] - (\text{reaction5}).k1*[BA]*[P]) * \text{Values}[h1]$     |
| $((\text{reaction4}).k1*[P]*[BP] - (\text{reaction4}).k2*[PBP]) * \text{Values}[h1]$                                                                                                                                 |
| $((\text{reaction5}).k1*[P]*[BA] + (\text{reaction6}).k1*[A]*[BP] - (\text{reaction5}).k2*[ABP] - (\text{reaction6}).k2*[ABP]) * \text{Values}[h1]$                                                                  |
| $((\text{reaction7}).k1*[B]*[R] + (\text{reaction8}).k2*[ABR] + (\text{reaction9}).k2*[PBR] - (\text{reaction7}).k2*[BR] - (\text{reaction8}).k1*[BR]*[A] - (\text{reaction9}).k1*[P]*[BR]) * \text{Values}[h2]$     |
| $((\text{reaction7}).k2*[BR] + (\text{reaction10}).k2*[ABR] + (\text{reaction11}).k2*[PBR] - (\text{reaction7}).k1*[B]*[R] - (\text{reaction10}).k1*[R]*[BA] - (\text{reaction11}).k1*[R]*[BP]) * \text{Values}[h2]$ |
| $((\text{reaction8}).k1*[BR]*[A] + (\text{reaction10}).k1*[R]*[BA] - (\text{reaction8}).k2*[ABR] - (\text{reaction10}).k2*[ABR]) * \text{Values}[h2]$                                                                |
| $((\text{reaction9}).k1*[BR]*[P] + (\text{reaction11}).k1*[BP]*[R] - (\text{reaction9}).k2*[PBR] - (\text{reaction11}).k2*[PBR]) * \text{Values}[h2]$                                                                |

Figure S2. Parameters of the proposed model of double competitive LFIA.
